# Supplementary material for: Tumour Colonisation of Parvimonas micra Is Associated with Decreased Survival in Colorectal Cancer Patients
Source: MDPI journal article supplement (doi:10.3390/cancers14235937), 2022-11-30
Supplement: s1 [file s1]

**Supplementary Table S1.** Clinicopathological characteristics of study patients in relation to *P. micra* and *F. nucleatum* in faeces.

|                            | <i>P. micra</i> |          | <i>P</i> value | <i>F. nucleatum</i> |          | <i>P</i> value |
|----------------------------|-----------------|----------|----------------|---------------------|----------|----------------|
|                            | Low             | High     |                | Low                 | High     |                |
| <b>Age, n (%)</b>          |                 |          |                |                     |          |                |
| ≤ 59                       | 27(64.3)        | 15(35.7) | 0.510          | 26(61.9)            | 16(38.1) | 0.584          |
| 60-69                      | 48(52.2)        | 44(47.8) |                | 45(50.0)            | 45(50.0) |                |
| 70-79                      | 48(58.5)        | 34(41.5) |                | 44(54.3)            | 37(45.7) |                |
| ≥ 80                       | 15(50.0)        | 15(50.0) |                | 15(48.4)            | 16(51.6) |                |
| <b>Gender, n (%)</b>       |                 |          |                |                     |          |                |
| Male                       | 86(58.1)        | 62(41.9) | 0.512          | 72(49.7)            | 73(50.3) | 0.192          |
| Female                     | 52(53.1)        | 46(46.9) |                | 58(58.6)            | 41(41.4) |                |
| <b>Location, n (%)</b>     |                 |          |                |                     |          |                |
| Right colon                | 30(60.0)        | 20(40.0) | 0.739          | 27(54.0)            | 23(46.0) | 0.916          |
| Left colon                 | 24(58.5)        | 17(41.5) |                | 23(56.1)            | 18(43.9) |                |
| Rectum                     | 84(54.2)        | 71(45.8) |                | 80(52.3)            | 73(47.7) |                |
| <b>Stage, n (%)</b>        |                 |          |                |                     |          |                |
| I                          | 30(63.8)        | 17(36.2) | 0.562          | 31(66.0)            | 16(34.0) | 0.144          |
| II                         | 44(53.7)        | 38(46.3) |                | 45(54.9)            | 37(45.1) |                |
| III                        | 36(52.2)        | 33(47.8) |                | 33(49.3)            | 34(50.7) |                |
| IV                         | 23(60.5)        | 15(39.5) |                | 16(42.1)            | 22(57.9) |                |
| <b>Tumour grade, n (%)</b> |                 |          |                |                     |          |                |
| Low grade                  | 108(58.4)       | 77(41.6) | 0.684          | 105(57.4)           | 78(42.6) | 0.311          |
| High grade                 | 15(53.6)        | 13(46.4) |                | 13(46.4)            | 15(53.6) |                |
| <b>Tumour type, n (%)</b>  |                 |          |                |                     |          |                |
| Non-mucinous               | 110(57.9)       | 80(42.1) | 0.394          | 106(56.1)           | 83(43.9) | 0.388          |
| Mucinous                   | 12(48.0)        | 13(52.0) |                | 11(45.8)            | 13(54.2) |                |

Fischer's exact test was used to compare categorical variables.
