# Supplementary material for: Tumour Colonisation of Parvimonas micra Is Associated with Decreased Survival in Colorectal Cancer Patients
Source: MDPI journal article supplement (doi:10.3390/cancers14235937), 2022-11-30
Supplement: s1 [file s1]

**Supplementary Table S2.** Molecular characteristics of study patients in relation to *P. micra* and *F. nucleatum* in faeces.

|                                  | <i>P. micra</i> |          | <i>P</i> value | <i>F. nucleatum</i> |          | <i>P</i> value |
|----------------------------------|-----------------|----------|----------------|---------------------|----------|----------------|
|                                  | Low             | High     |                | Low                 | High     |                |
| <b><i>KRAS</i> status, n (%)</b> |                 |          |                |                     |          |                |
| Wild type                        | 69(57.5)        | 51(42.5) | 0.330          | 63(53.4)            | 55(46.6) | 0.522          |
| Mutant                           | 39(66.1)        | 20(33.9) |                | 35(59.3)            | 24(40.7) |                |
| <b><i>BRAF</i> status, n (%)</b> |                 |          |                |                     |          |                |
| Wild type                        | 95(62.1)        | 58(37.9) | 0.215          | 87(57.6)            | 64(42.4) | 0.153          |
| Mutant                           | 14(48.3)        | 15(51.7) |                | 12(41.4)            | 17(58.6) |                |
| <b>MSI status, n (%)</b>         |                 |          |                |                     |          |                |
| MSS                              | 104(64.2)       | 58(35.8) | 0.004          | 93(58.1)            | 67(41.9) | 0.037          |
| MSI                              | 6(28.6)         | 15(71.4) |                | 7(33.3)             | 14(66.7) |                |

Fischer's exact test was used to compare categorical variables. *Abbreviations:* MSI, microsatellite unstable; MSS, microsatellite stable.
